1        **Wheat developmental traits as affected by the interaction between *Eps-7D* and**  
2        **temperature under contrasting photoperiods with insensitive *Ppd-D1* background**

3        Priyanka A. Basavaraddi<sup>1\*</sup>, Roxana Savin<sup>1</sup>, Simon Griffiths<sup>2</sup>, Gustavo A. Slafer<sup>1,3</sup>

4        <sup>1</sup>Department of Crop and Forest Sciences, University of Lleida - AGROTECNIO Center,  
5        Av. R. Roure 191, 25198 Lleida, Spain

6        <sup>2</sup> John Innes Centre, Norwich Research Park, Colney Ln, Norwich, NR4 7UH, United  
7        Kingdom

8        <sup>3</sup> ICREA, Catalanian Institution for Research and Advanced Studies, Spain

9        \* Corresponding author. Email address: priyanka.basavaraddi@udl.cat

10

11        **Abstract**

12        Earliness *per se* (*Eps*) genes are important to fine tune adaptation, and studying their  
13        probable pleiotropic effect on wheat yield traits is worthwhile. In addition, it has been  
14        shown that some *Eps* genes interact with temperature. We studied two NILs differing in  
15        the newly identified *Eps-7D* but carrying insensitive *Ppd-D1* in the background under  
16        three temperature regimes (9, 15 and 18 °C) and two photoperiods (12 h and 24 h). *Eps-*  
17        *7D* affected time to anthesis as expected and the *Eps-7D-late* allele extended both the  
18        period before and after terminal spikelet. The interaction effect of *Eps-7D* × temperature  
19        was significant but not cross-over: the magnitude and level of significance of the  
20        difference between NILs with the *late* or *early* allele was affected by the growing  
21        temperature (i.e. difference was least at 18 °C and largest at 9 °C), and differences in  
22        temperature sensitivity was influenced by photoperiod. Rate of leaf initiation was faster  
23        in NIL with *Eps-7D-early* than with the *late* allele which compensated for the shorter  
24        duration of leaf initiation resulting in similar final leaf number between two NILs. *Eps-*  
25        *7D-late* consistently increased spike fertility through improving floret primordia survival  
26        as a consequence of extending the late reproductive phase.

27

28        **Key words:** spike fertility, leaf appearance, spikelet primordia, temperature ×  
29        photoperiod

30

31

## 32 **Introduction**

33 Wheat development is critical for yield determination as it controls not only adaptation  
34 (i.e. the critical stage of anthesis must occur when conditions are best, minimising stresses  
35 during grain number determination and grain weight realisation; Fischer, 2011; Reynolds  
36 et al., 2012) but also the timing and rate of generation of structures that will become  
37 sources and sinks (González et al., 2005a; Whitechurch and Slafer, 2001). Indeed, wheat  
38 yield (as well as that of other grain crops) is the consequence of the balance between  
39 source- and sink-strength, in turn determined as the result of initiation, degeneration and  
40 rate of growth of leaves, tillers, spikelets, florets and grains. Genetic factors controlling  
41 the duration of the developmental phases would be expected to have pleiotropic effect on  
42 yield traits (Börner et al., 1993; Foulkes et al., 2004). Certainly, a number of studies have  
43 shown that modifying the duration of particular developmental phases either through  
44 genetic factors (Gawroński et al., 2014; Lewis et al., 2008; Ochagavía et al., 2018a; Pérez-  
45 Gianmarco et al., 2018; Prieto et al., 2018a) or environmental treatments (González et al.,  
46 2005a, 2003a, 2003b; Serrago et al., 2008; Steinfort et al., 2017; Wall and Cartwright,  
47 1974) improves spike fertility; which in turn is a major determinant of wheat yield (Slafer  
48 et al., 2014; Würschum et al., 2018).

49 Time to anthesis in wheat encompasses various phases with different degrees of  
50 sensitivities towards cold temperature and daylength termed as vernalisation (*Vrn*) and  
51 photoperiod (*Ppd*) sensitivities, respectively. And the genetic factors responsible for such  
52 sensitivities are referred as *Vrn* and *Ppd* genes. The *Vrn*-sensitivity genes define the  
53 growth habit (*Vrn*-sensitive cultivars are winter wheats while *Vrn*-insensitive cultivars  
54 are spring wheats), while *Ppd*-sensitivity genes determine whether flowering will be  
55 earlier (cultivars with little or no sensitivity) or late (very sensitive cultivars) in spring.  
56 However, once the effects of *Vrn* and *Ppd* sensitivity genes are removed (because  
57 genotypes have insensitive alleles for all these genes or because plants are grown under  
58 long days after having been fully vernalised), genotypes may still exhibit differences in  
59 earliness of flowering. These genotypic differences are known as earliness *per se* (*Eps*)  
60 or intrinsic earliness (Slafer, 1996). Past wheat breeding has already ventured changing  
61 time to anthesis to expand adaptation and to maximise yield by positioning anthesis time  
62 to avoid yield penalties due to abiotic stresses (Araus et al., 2002; Richards, 1991). Then,  
63 major changes in anthesis time may not be as relevant as fine adjustments. The importance  
64 of *Eps* genes may be even higher than that of the major *Vrn* and *Ppd* sensitivity genes  
65 when the need is to fine adjust phenology because they normally have a relatively small

66 effect (Bullrich et al., 2002; Griffiths et al., 2009; Lewis et al., 2008; Ochagavía et al.,  
67 2018b). Indeed, due to their relatively subtle effect, Eps genes may have gone undetected  
68 during the course of selection (Zikhali et al., 2014), and are mostly identified as QTLs  
69 (Zikhali et al., 2014). Although much lesser known, their possible pleotropic effect on  
70 yield components might be one of the reasons for their indirect selection (Alvarez et al.,  
71 2016).

72 Most of what is known of the identified Eps genes relates to their effects on time to  
73 anthesis. The importance of these genetic factors, like any other genes, to be used in  
74 breeding programmes is limited by the lack of understanding of their detailed effect on  
75 individual phases occurring before anthesis, and their possible influence on different yield  
76 attributes along the way. Although yield components are being determined during the  
77 whole growing season, some phases are more critical than others (Fischer, 2007; Slafer,  
78 2003). Duration of phase before and after terminal spikelet (TS) may have completely  
79 different relevance for yield determination. Indeed, it is during the TS-anthesis phase that  
80 spike development controlling spike dry weight and spike fertility are determined (Abbate  
81 et al., 1997; Fischer, 2007; Halloran and Pennell, 1982; Serrago et al., 2008).

82 Some recent studies have shown the possible relevance of Eps genes not only in fine  
83 adjusting anthesis time, but also through affecting spikelet number (Alvarez et al., 2016)  
84 and grains per spike (Lewis et al., 2008). This is in line with the hypothesis that genes  
85 effecting developmental traits might alter the dynamics of organs initiated in response to  
86 changes in the duration (Ferrante et al., 2013; González et al., 2005b; Miralles and  
87 Richards, 2000; Prieto et al., 2018a, 2018b; Snape et al., 2001). The dynamics of organs  
88 such as tillers, spikelets and florets (resulting *a posteriori* in yield components) may well  
89 depend, at least in part, upon the time allocated for their development.

90 Despite Eps genes owe their name to the assumption that genotypic differences produced  
91 were “intrinsic” (*per se*) and therefore independent of the environment (Slafer, 1996), it  
92 was hypothesised to be temperature sensitive genes (Slafer and Rawson, 1995). The  
93 speculated Eps  $\times$  temperature interaction (Appendino and Slafer, 2003; Bullrich et al.,  
94 2002; Lewis et al., 2008) was recently proven in few studies (e.g. Ochagavía et al., 2019;  
95 Prieto et al., 2020). However, what we collectively call Eps genes are consistent in their  
96 effect on time to anthesis, but could strongly differ in their effects on other traits. It could  
97 be possible that the temperature responses of each Eps be different in terms of type and  
98 magnitude of the response and this needs to be studied. Understanding whether

99 temperature affects the functionality of each *Eps* is necessary to explore the kind of  
100 environment those *Eps* could be effective and beneficial.

101 Recently an *Eps* QTL on chromosome 7D was identified in wheat which was known to  
102 influence time to heading. Four NILs were generated from the cross Paragon (a modern  
103 UK commercial cultivar; e.g. (Wingen et al., 2017) and Baj (a CIMMYT cultivar, used  
104 frequently as check; e.g. (Mondal et al., 2016) both of which are spring type with no  
105 requirements of vernalisation. Paragon has the *Eps-7D-late* and *Ppd-D1b* alleles while  
106 Baj has the *Eps-7D-early* and *Ppd-D1a* alleles. Thus the four NILs comprised the four  
107 combinations of both alleles and had identical mixture of Paragon and Baj in the  
108 background. For simplicity of presentation of results, in the present paper we aimed to  
109 evaluate the direct effect of the *Eps-7D* alleles (comparing the performance of the NILs  
110 having always the *Ppd-D1a* allele) and the interaction with temperature at two contrasting  
111 photoperiods to quantify mainly the effect of *Eps-7D* on phenology as well as dynamics  
112 of organ development. The NILs were grown under three constant temperatures (9, 15  
113 and 18 °C) and two very contrasting photoperiods (12 and 24 h). In a companion paper  
114 (Basavaraddi et al., submitted), we analysed to what degree the allelic form of the *Eps-*  
115 *7D* gene affect the sensitivity to photoperiod given by the strongest *Ppd* gene (*Ppd-D1*)  
116 and its interaction with temperature as well as whether the allelic form of *Ppd-D1* in the  
117 background modifies the effect of *Eps-7D* and its interaction with temperature.

118

## 119 **Results**

120 Time to anthesis was inversely related to both growing temperature (longest at 9 °C and  
121 shortest at 18 °C) and photoperiod (longest at 12 h and shortest at 24 h) (Fig. 1), the latter  
122 even though all lines carry the insensitive photoperiod allele in chromosome 1D (*Ppd-*  
123 *D1a*). Although these two direct effects of temperature and photoperiod are expected we  
124 also found a significant interaction between them (Fig. 1c), that was not simply a  
125 reflection of the temperature effect on development as the difference between short and  
126 long photoperiod was largest in the intermediate temperature. This interaction reflects the  
127 fact that sensitivity to temperature was stronger under long than under short photoperiod  
128 (*cf.* Fig. 1a and 1 b). The interaction was significant but not cross-over: the NIL with the  
129 *Eps-7D-late* allele was always later to flower than that with the *early* allele (Fig. 1), but  
130 the magnitude and level of significance of the difference between NILs with the *late* or  
131 *early* allele was affected by the growing temperature (i.e. difference was least, and non-

132 significant under SD, at 18°C and largest and clearly significant at 9°C; Fig. 1a, b). The  
 133 effect of the *Eps-7D* gene did not show any interaction with photoperiod (Fig. 1c) and  
 134 therefore the magnitude of difference between *Eps-7D-late* and *early* NILs were similar  
 135 at both photoperiods, but when considered within each particular environment, the  
 136 differences were more significant under long than under short days (Fig. 1a, b).  
 137  
 138

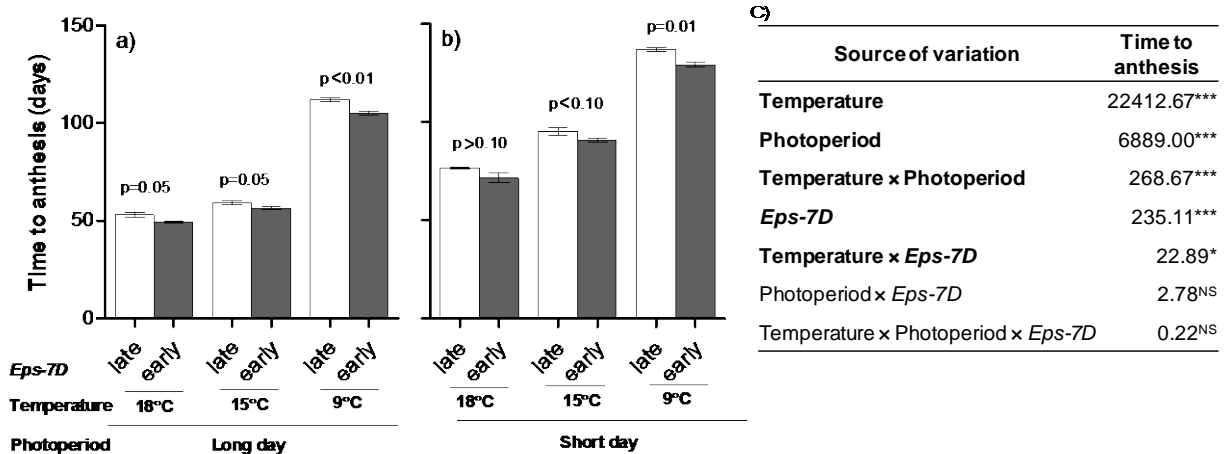

139  
 140 Figure 1. Duration of whole phase from seedling emergence to anthesis for the lines  
 141 carrying *Eps-7D-late* (open bars) or *-early* (closed bars) on *Ppd-D1a* background under  
 142 three growing temperatures at long day (a) and short days (b). Error bars indicate the  
 143 SEMs of the mean and the “P” values stand for the level of significance exclusively due  
 144 to the action of the *Eps-7D* gene within each temperature and photoperiod condition. The  
 145 output (mean squares) of the three-way ANOVA for time to anthesis (days) is included  
 146 on the right (c). Significance level \* p < 0.05; \*\*\*p < 0.001; NS= non-significant.

147  
 148 The effects of temperature and photoperiod on time to anthesis were also seen for the two  
 149 component phases considered here: both time from seedling emergence to TS (when all  
 150 leaves and spikelets are initiated) and from then to anthesis (i.e. the late reproductive  
 151 phase of stem elongation, LRP) were longer under low temperatures and short  
 152 photoperiod than under warm temperatures and long photoperiod (Fig. 2). However, (i)  
 153 even though both phases were clearly sensitive to the growing temperature, their  
 154 sensitivity was not the same: duration from seedling emergence to TS responded to  
 155 temperature less markedly than duration of the LRP (cf. differences between Fig.2a and

156 b with Fig.2c and d, taking into account the different scales); and (ii) alike for the whole  
157 period to anthesis the sensitivity to temperature was stronger under long than under short  
158 days for both phases (Fig. 2). Regarding the specific effect of the *Eps-7D* gene, the NIL  
159 with the *Eps-7D-late* allele tended to have longer phases both from seedling emergence  
160 to TS and from then to anthesis across all growing conditions (Fig. 2).

161 However, as the effect on the whole period from seedling emergence to anthesis was  
162 subtle, that on the duration of each of its component phases was naturally even smaller  
163 and most differences became non-significant with the two-way ANOVA analyses done  
164 for each growing condition; particularly for the LRP (Fig. 2). But looking at the  
165 relationship between the duration of the total time to anthesis and its component phases  
166 it seems clear that both were at least equally important, not only reflecting the differences  
167 between growing conditions but also the effects of the *Eps-7D* gene (Supplementary Fig.  
168 S1). Thus, even though most differences between NILs with *Eps-7D-early* and *-late*  
169 alleles were non-significant for the LRP (Fig. 2c, d), it can be seen that the magnitude of  
170 the shortening of the phases produced by the effect of having the *Eps-7D-early* allele was  
171 similar in relative terms for both phases (averaging across the six growing conditions the  
172 duration of the phase to TS and that of the LRP was 2.5 and 3 d earlier, respectively in  
173 the NIL with the *Eps-7D-early* than with the *-late* allele).

174

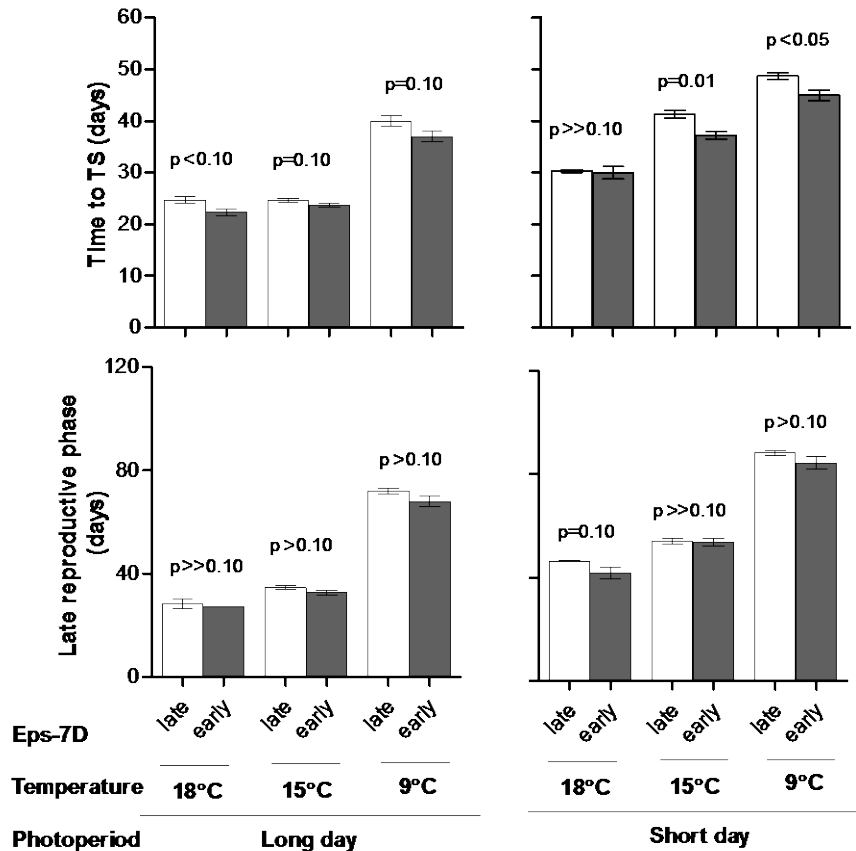

175

176 Figure 2. Duration of phase from seedling emergence to TS (upper panels) and time from  
 177 then to anthesis, late reproductive phase (lower panels) for the lines carrying *Eps-7D-late*  
 178 (open bars) or *early* (closed bar) on *Ppd-D1a* background under long (left panels) and  
 179 short day (right panels) at three temperatures. Error bars indicate the SEs of the mean and  
 180 the “P” values stand for the level of significance exclusively due to the action of the *Eps-*  
 181 *7D* gene within each temperature and photoperiod condition.

182

183 Final leaf number was not significantly affected by temperature or the *Eps-7D* gene  
 184 (Table 1). Thus, any effects of these two factors on the duration of the vegetative phase  
 185 of leaf initiation (virtually from sowing to seedling emergence or soon after it; see below)  
 186 would have been compensated by opposite effects on the rate of leaf initiation.  
 187 Photoperiod effect on FLN was small but clear; averaging across temperatures and *Eps-*  
 188 *7D* alleles plants developed slightly less than 1 additional leaf if grown under short  
 189 photoperiod. This means that when plants were exposed to long days they immediately  
 190 reached floral initiation at seedling emergence (as there would be 4 leaf primordia in the  
 191 embryo and a couple would have been initiated between sowing and seedling emergence)



192 whilst at short days it took an additional plastochron to reach floral initiation, a difference  
 193 that was very slight as expected (all plants were insensitive to photoperiod regarding the  
 194 major gene *Ppd-D1*).

195 The initiated leaves always appeared at a reasonably constant pace (as indicated by the  
 196 very high coefficients of determination of the linear relationship between leaf number and  
 197 time;  $r^2 > 0.92$ ,  $n \geq 10$ ; Table 1). The rate of appearance of these leaves was positively  
 198 affected by temperature and photoperiod (the higher the temperature or longer the day the  
 199 faster the rate of leaf appearance; Table 1). The *Eps-7D* gene also affected slightly but  
 200 consistently the rate of leaf appearance, appearing faster in NIL with the *Eps-7D-early*  
 201 allele than the one with *late* allele, with the exception of plants under long days and 9 °C  
 202 in which the rates of leaf appearance of the NILs did not differ (Table 1).

203

204 **Table 1.** Effects of the *Eps-7D* gene on final leaf number (FLN), rate of leaf appearance  
 205 (RLA; estimated as the slope of the linear regression of leaf number vs thermal time), and  
 206 the coefficient of determination for that regression ( $r^2$ ), when grown under two contrasting  
 207 photoperiods (12 and 24 h) and three temperatures

| Growing conditions |       | Allele at <i>Eps-7D</i> | FLN       | RLA (leaves d <sup>-1</sup> ) | r <sup>2</sup> |
|--------------------|-------|-------------------------|-----------|-------------------------------|----------------|
| Long day           | 18 °C | Late                    | 6.2 ± 0.1 | 0.142 ± 0.003                 | 0.953***       |
|                    |       | Early                   | 6.0 ± 0.0 | 0.149 ± 0.005                 | 0.923***       |
|                    | 15 °C | Late                    | 6.0 ± 0.0 | 0.122 ± 0.001                 | 0.986***       |
|                    |       | Early                   | 6.0 ± 0.0 | 0.131 ± 0.001                 | 0.983***       |
|                    | 9 °C  | Late                    | 6.0 ± 0.0 | 0.083 ± 0.001                 | 0.980***       |
|                    |       | Early                   | 6.0 ± 0.0 | 0.083 ± 0.001                 | 0.968***       |
| Short day          | 18 °C | Late                    | 7.0 ± 0.0 | 0.126 ± 0.001                 | 0.983***       |
|                    |       | Early                   | 6.6 ± 0.1 | 0.130 ± 0.002                 | 0.975***       |
|                    | 15 °C | Late                    | 7.0 ± 0.0 | 0.083 ± 0.001                 | 0.985***       |
|                    |       | Early                   | 6.9 ± 0.1 | 0.087 ± 0.001                 | 0.984***       |
|                    | 9 °C  | Late                    | 6.7 ± 0.2 | 0.066 ± 0.001                 | 0.959***       |
|                    |       | Early                   | 6.1 ± 0.1 | 0.072 ± 0.001                 | 0.977***       |

208 \*\*\*All linear regressions of leaf number vs time were highly significant (P<0.001; n=10-  
 209 25, depending on the temperatures and photoperiod as leaf number was determined thrice  
 210 a week)



211

212 As floral initiation occurred at seedling emergence or just 1 plastochron later (see above),  
 213 we could only collect data revealing the dynamics of spikelet initiation (and estimate from  
 214 that dynamics the spikelet plastochron). Spikelets were initiated at a more or less constant  
 215 rate whose actual value was rather similar (and few differences were not consistent) for  
 216 NILs with the *early* or *late* allele in *Eps-7D*, and in all cases clearly slower at 9 than at 15  
 217 or 18 °C and slower under short than under long days (Fig. 3).

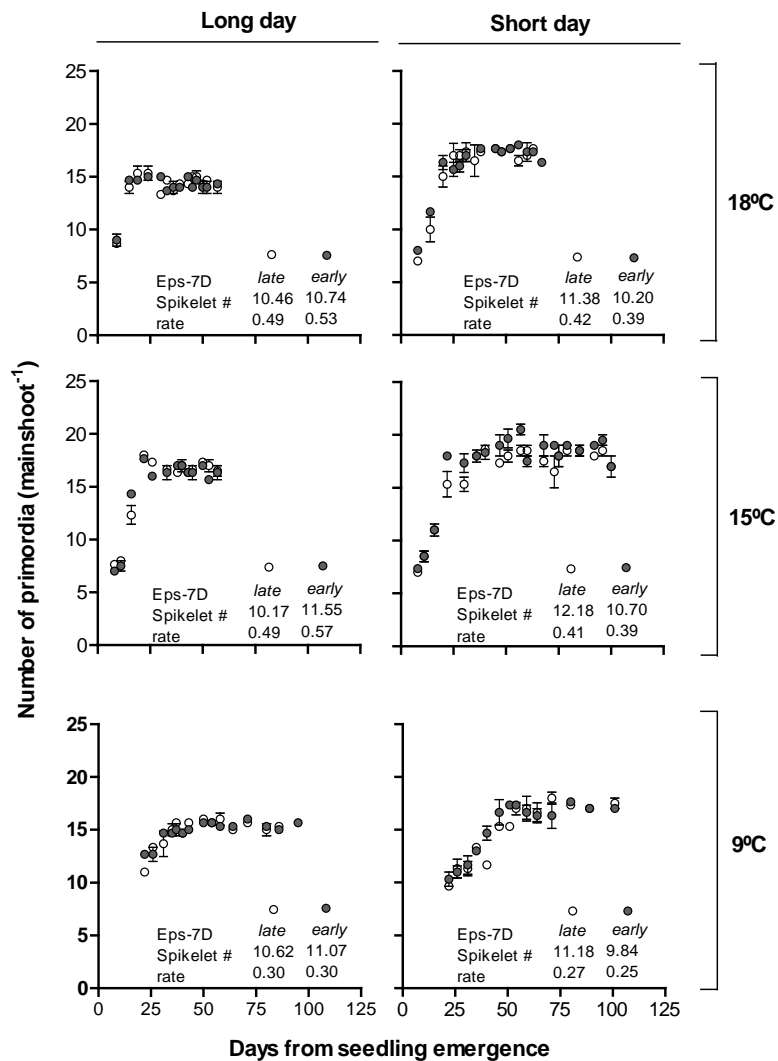

218

219 Figure 3. Relationship between number of primordia and days from seedling emergence  
 220 for *Eps-7D*-late (open circles) and early (closed circles) under long (left panels) and short  
 221 days (right panels) at 18 (upper top panels), 15 (middle panels) and 9 °C (bottom panels).  
 222 Inside each panel are the total number of spikelet primordia and rate of spikelet initiation  
 223 (spikelet primordia per day).

224

225 The dynamics of floret development was recorded for all the initiated florets within  
226 apical, central and basal spikelets that reached a developmental stage of W4.5 until they  
227 either reached W10 (fertile floret) or die. Floret 1 (most proximal floret to rachis) in both  
228 *Eps-7D-late* and *early* lines reached the stage of fertile floret (W10) under all three  
229 temperatures and two photoperiods, while F4 (the most distal floret consistently reaching  
230 at least the stage W4.5) has never reached to a stage close to W10 in any of the growing  
231 conditions (Supplementary Fig. S2). Then to understand the effects of treatments on spike  
232 fertility, we concentrated the results on the fate of the second and third florets from the  
233 rachis (F2 and F3 respectively) which were those responsible for the differences in  
234 number of fertile florets per spike at anthesis. Alike what was described for the initiation  
235 of spikelets, the rates of floret development were affected by the growing conditions.  
236 Florets developed much faster at 18 than at 9 °C but also the opposite was true with the  
237 duration of the period of floret development: shortest and longest at 18 and 9 °C,  
238 respectively (Figs. 4, S2). Photoperiod did not affect noticeably the rate of floret  
239 development but did modify the duration of the period of floret development (Figs. 4,  
240 S2).

241

242

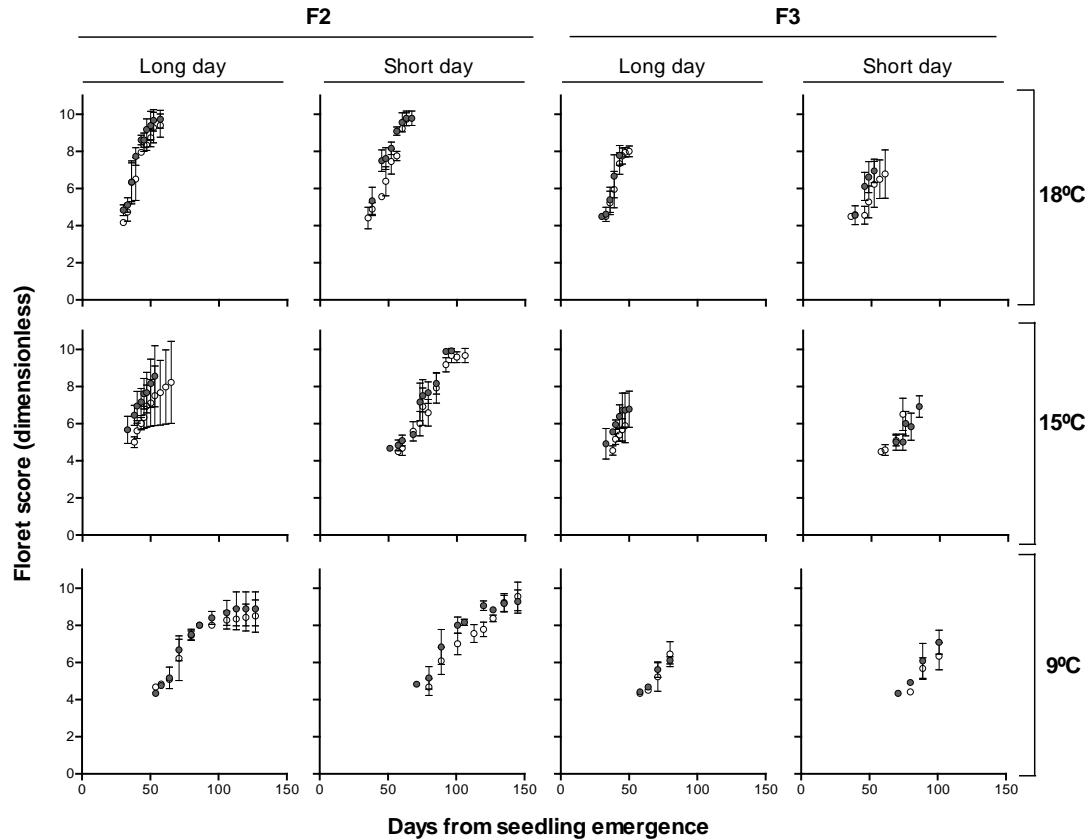

243

244 Figure 4. Relationship between floret development (floret score of the Waddington scale  
245 proposed by Waddington et al. 1983) and days from seedling emergence for *Eps-7D*-late  
246 (open circles) and early (closed circles) for floret F2 (left panels) and F3 (right panels)  
247 under long and shot day at 18 (upper panels), 15 (middle panels) and 9 °C (bottom panels).  
248 The error bars are SEs of means of floret scores from apical, central and basal spikelets.

249

250 Regarding the effect of the *Eps-7D* gene, Floret 2 was initiated more or less at the same  
251 time for both *Eps-7D*-late and -early under long day in all the three temperatures but  
252 under short day *Eps-7D*-early tended to initiate the F2 earlier and had faster development  
253 compared to late allele (Fig. 4). Under long day F2 reached W10 at 18°C for both *Eps*-  
254 *7D*-late and -early alleles, while one third of the florets F2 in *Eps-7D*-late reached W10  
255 under lower temperatures (15 and 9 °C) and F2 from *Eps-7D*-early aborted when they had  
256 reached the W8.5 stage (green anthers). None of the F3 florets reached W10 regardless  
257 of whether the lines had the *Eps-7D*-late or -early alleles and therefore the effect of the  
258 *Eps-7D* gene was inappreciable. Even though the F4 florets did never reach the stage of

259 fertile florets they attained higher floret score when the line had the *Eps-7D-late* allele,  
 260 especially under short day conditions (Supplementary Fig. 2).

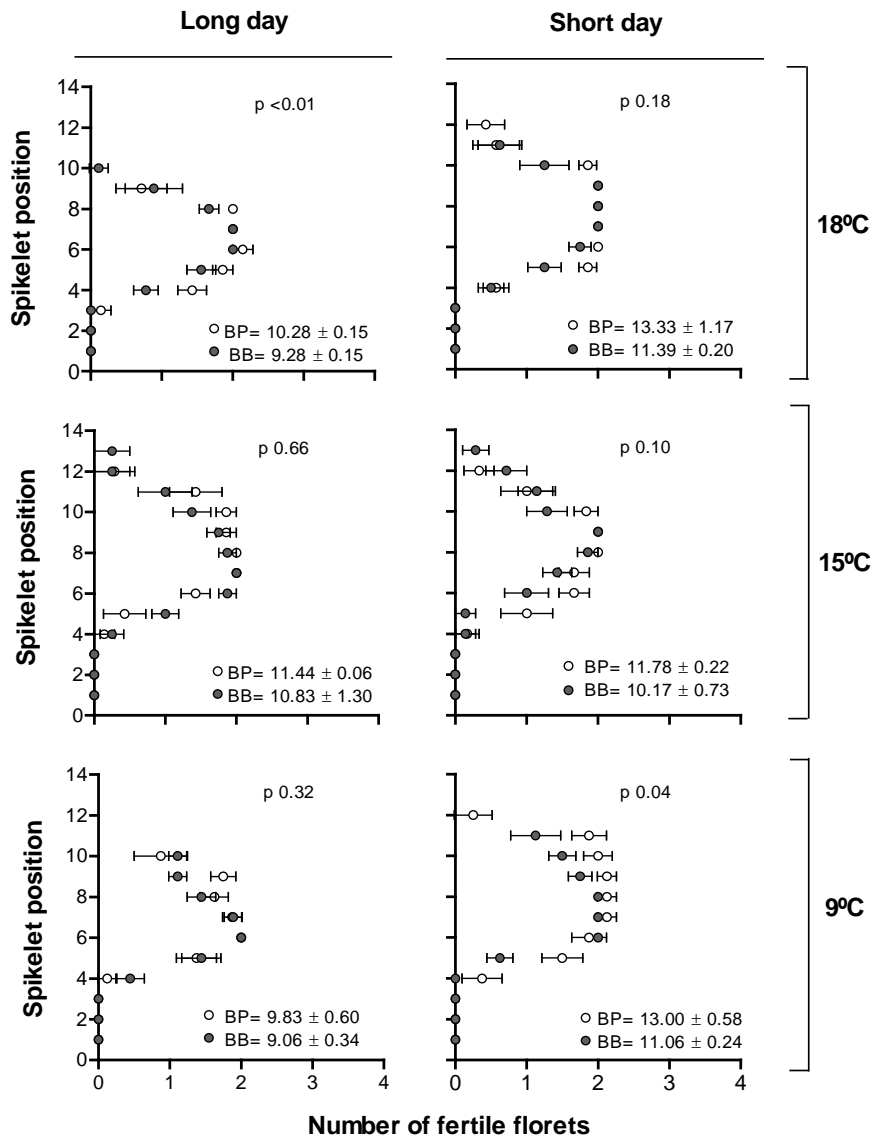

261

262 Figure 5. Number of fertile florets at anthesis per spikelet from basal to terminal spikelet for *Eps-*  
 263 *7D-late* (open circles) and *-early* (closed circles) NILs under long (left panels) and shot days (right  
 264 panels) at 18 (upper panels), 15 (middle panels) and 9 °C (bottom panels). Inside each panel are  
 265 the fertile florets per spike ± SEs and p value.

266

267 Spike fertility was not consistently affected by temperature (because of the opposite  
 268 effects of this factor in the rate and duration of floret development, see above); and was  
 269 higher in short than in long days by virtue of the photoperiod effect on duration of floret  
 270 development (Fig. 6). The *Eps-7D* gene had an effect on the number of fertile florets per

271 spike as the NIL with the *late* allele showed a consistent trend (though not always  
272 statistically significant) to have more fertile florets than the NIL with the *early* allele (Fig.  
273 6).

274 The overall direct effect of *Eps-7D* gene on the number of fertile florets was much higher  
275 than the direct effect of temperature and *Eps-7D* × temperature interaction effect (F ratio  
276 was 8.50, 5.61 and 0.65 for *Eps-7D*, temperature and their interaction respectively). In  
277 that the averaging across the temperature the *Eps-7D-late* had almost c. 1 extra fertile  
278 floret per spike than that of early allele under LD and the difference doubled under short  
279 photoperiod. The huge effect of temperature on the phenology was not reflected in the  
280 fertile floret as temperature also affected the rate of floret development (similar to rate of  
281 leaf appearance and spikelet primordia initiation explained above) meaning longer  
282 duration of floret development due to low temperature did not allow more florets to  
283 advance towards fertile stage rather development of each floret was significantly slow  
284 (e.g. F1 took 22 d and 74 d at 18 and 9 °C, respectively under LD to advance from W4.5  
285 to W10 for *Eps-7D-late* allele).

286

## 287 **Discussion**

288 Although the main focus of this study was on the effects of this newly reported *Eps-7D*  
289 gene on developmental processes and whether or not those effects were affected by the  
290 growing temperature, we also reported the effects of temperature, photoperiod and their  
291 interaction on these developmental processes. As the temperature × photoperiod and *Eps-*  
292 *7D* × temperature interactions were significant (but that of *Eps-7D* × photoperiod and the  
293 triple interactions were not), we firstly discussed briefly the effects of the environmental  
294 factors and then those of the *Eps* and its interaction with temperature.

295

296 **Temperature, photoperiod and their interaction.** In general, developmental rates were  
297 faster (reducing the length of both the whole cycle to anthesis and its component phases  
298 occurring before and after terminal spikelet) under high than under low temperature  
299 conditions. This overall effect is in line with the recognised universal effect of  
300 temperature on accelerating developmental processes not only in wheat (Slafer and  
301 Rawson, 1994a; John and Megan, 1999); as well as in and other crops (Parent and  
302 Tardieu, 2012) and other unrelated organisms (Gillooly et al., 2002). Also the rate of leaf  
303 appearance (that was constant for all leaves, as expected when FLN is less than 8;

304 (Ochagavía et al., 2017; Slafer and Rawson, 1997) was positively responsive to  
305 temperature; as has been known for a long time (e.g. Miglietta, 1989; Slafer and Rawson,  
306 1997). As temperature accelerated the rate of primordia initiation we found a sort of  
307 compensation with the acceleration of development (i.e. phases are shorter but primordia  
308 are initiated faster under higher temperatures). Consequently, not clear effects of  
309 temperature were evident for the final leaf number, the number of spikelets per spike or  
310 the number of fertile florets per spike, again as expected from this universal effect of  
311 temperature on rates of phenological development and of initiation of primordia during  
312 the corresponding phenological phases (Slafer and Rawson, 1994a).

313 There was a direct effect of photoperiod on time to anthesis, that was not restricted to the  
314 phase from seedling emergence to TS as the LRP was also affected by the exposure to  
315 contrasting day lengths (in line with previous evidences in the literature showing that the  
316 LRP can be highly sensitive to photoperiod; González et al., 2005b, 2003; Pérez-  
317 Gianmarco et al., 2018). As NILs had the insensitive allele for *Ppd-D1* gene (*Ppd-D1a*),  
318 which is the insensitivity gene frequently reported to have the strongest effect (e.g. Langer  
319 et al., 2014; Pérez-Gianmarco et al., 2018), we did not expect large differences between  
320 growing the plants at short or long photoperiod. However, the NILs would have sensitive  
321 alleles in the *Ppd-1* loci on A and/or B genome. These genes produce responses that are  
322 frequently less noticeable than *Ppd-D1*, but still significant (Bentley et al., 2011; Pérez-  
323 Gianmarco et al., 2018; Shaw et al., 2013, 2012). Again as expected from the literature,  
324 photoperiod effects on the rate of phenological development is not paralleled by  
325 concomitant effects on the rate of leaf initiation and therefore the final number of leaves  
326 was increased under short days (Slafer and Rawson 1994b). Long photoperiod not only  
327 reduced FLN but also accelerated the rate of leaf appearance (Mosaad et al., 1995; Slafer  
328 and Rawson, 1997) both factors contributing to the shortening of the time to anthesis  
329 produced by the extended photoperiod.

330 Beyond the direct effects of temperature and photoperiod discussed above, in the present  
331 study there was a clear temperature x photoperiod interaction. For instance, analysing in  
332 detail the responses to temperature in the contrasting photoperiods there were  
333 particularities that are worth noticing. The length of the phase under long day were similar  
334 for 15 and 18 °C while it differed clearly under short day between these temperatures  
335 showing shorter phase at 18 than at 15 °C indicating that the probable  $T_{\text{optimum}}$  for  
336 development under long days is lower than that under short day. This was all the more so

337 when looking at the time to TS but not so much when LRP was considered, which is in  
338 line with the fact that cardinal temperatures would increase with the stage of development  
339 (Rahman and Wilson, 1978; Slafer and Savin, 1991; Slafer and Rawson, 1995). The fact  
340 that photoperiod affect the temperature response has been described several times not  
341 only for wheat (Kiss et al., 2017; Slafer and Rawson, 1996) but also for barley (Hemming  
342 et al., 2012; Karsai et al., 2013).

343 ***Eps-7D* and *Eps-7D* × temperature interaction.** In line with the previous knowledge  
344 about other known Eps genes, the *Eps-7D* studied here also had subtle through consistent  
345 and significant effects on time to anthesis (Ochagavía et al., 2018b, 2019; Zikhali et al.,  
346 2014). This is not surprising as even though each Eps gene would have different  
347 mechanisms of action, by definition they all result in relatively small differences in time  
348 to anthesis or heading (Griffiths et al., 2009; Zikhali et al., 2014) to the degree that many  
349 times may be undetectable if photoperiod and vernalisation requirements are not fully  
350 satisfied (Zikhali et al., 2014). There are very fewer studies on detailed effect of Eps genes  
351 on pre-anthesis and, unlike with the overall time to anthesis, they vary in their conclusion  
352 on whether Eps affect early or late stages of development. While the study by Lewis et  
353 al. (2008) reported that the effect of *Eps-A<sup>m1</sup>* on time to anthesis was mainly due to its  
354 effect on the duration of early developmental phases until terminal spikelet, others  
355 (Ochagavía et al., 2018) reported varying effect of *Eps-D1* on all the three phases,  
356 vegetative, early reproductive and late reproductive, depending on the cross (genetic  
357 background). The *Eps-7D* we characterised in the present study (with *Ppd-D1a* in the  
358 genetic background) was found to affect the duration of both the early phase from  
359 seedling emergence to TS as well as that of the LRP, similarly to what was reported for  
360 the *Eps-D1* by Ochagavía et al. (2018). The effect of *Eps-7D* on time to anthesis was  
361 related to both number and rate of leaf appeared in that the NIL with *Eps-7D-late* allele  
362 had slightly more leaves developed that appeared slightly slower.

363 Considering that the NILs had similar FLN might seem like effect of *Eps-7D* on  
364 phenology was realised much later during the development (after flag leaf initiation).  
365 Indeed, the dissection of apex stipulated that the *Eps-7D* affected development since early  
366 reproductive phase. The rate of leaf appearance was affected by *Eps-7D* allele which  
367 resulted in *Eps-7D-early* allele to have similar FLN as that of *late* allele for a shorter  
368 duration. This implies a different mechanism regarding leaf development than what was



369 shown for the *Eps-D1*; which affected time to anthesis through mainly affecting time from  
370 flag leaf emergence to anthesis (Prieto et al., 2020).

371 Improvements in spike fertility may be possible with either lengthening the LRP (with no  
372 compensation from the change in the rate of development, so that more florets may  
373 become fertile) and/or increasing spike dry weight at anthesis (which could be in turn the  
374 result of lengthened LRP or increased dry matter partitioning; Slafer et al., 2015).  
375 Changes in spike dry weight are uncertain with minor differences in phenology (unless  
376 partitioning was altered) and differences in spike fertility would be very subtle which  
377 would mainly be the result of the efficiency (Prieto et al., 2020 and references quoted  
378 there in). The consistent trend observed in the present study for the *Eps-7D-late* allele to  
379 produce more fertile florets per spike than the *early* allele was result of couple of extra  
380 florets in the distal position (F2 and F3 in this case) that continued developing for a  
381 slightly longer time as a consequence of the slightly lengthened LRP. Effect of *Eps-7D*  
382 on the duration of floret development did not alter number of florets primordia produced  
383 but altered floret survival which is strongly supported by other studies where major or  
384 minor differences in length of floret development phase resulting in differences in spike  
385 fertility was not through number of floret primordia produced (Prieto et al., 2020 and  
386 refernecs quoted there in). There was huge difference in duration of floret development  
387 between 18 and 9 °C but this did not generate similar improvement in fertile florets per  
388 spike at the low temperature because the driving force for decelerating the rate of  
389 development during the LRP was also decelerating the rate of floret development.

390 Further, in the present study there was clear interaction effect of *Eps-7D* × temperature  
391 on the phenology. Although temperature accelerates development of all phases in all  
392 crops (see above) that only means that there would be no cases of insensitivity, but  
393 genotypic variation in sensitivity has been shown since long time ago (Atkinson and  
394 Porter, 1996; Rawson and Richards, 1993; Slafer and Rawson, 1995). At least in part, the  
395 genotypic variation in sensitivity to temperature might reflect the interaction of *Eps* genes  
396 with temperature (Slafer, 1996). The interaction we found in this study between *Eps-7D*  
397 and temperature was not as obvious as to observe the inverse ranking of *Eps-7D-late* and  
398 *early* allele at varying temperature, but clear differences in the magnitude of the effect of  
399 the *Eps-7D* allele at different temperature. To the best of our knowledge such interaction  
400 had been only recently shown in hexaploid wheat for the *Eps-D1* (Ochagavía et al., 2019),  
401 although it had been recognised time ago in diploid wheat (Bullrich et al., 2002), and now

402 we expand the concept within commercial wheat germplasm to the new *Eps-7D*. Both  
403 the NILs carrying either *Eps-7D-late* and *early* accelerated the rate of development when  
404 the temperature was increased but the *Eps-7D-early* had higher sensitivity to temperature  
405 than the *late* allele which made *early* allele to have much shorted phenology than the *late*  
406 allele. Alleles of *Eps* genes might have different optimum temperatures which shows  
407 differences in earliness by *early* or lateness by *late* allele under various temperatures  
408 (Appendino and Slafer, 2003).

409

## 410 **Materials and methods**

411 The experiments were conducted under controlled conditions in growth chambers (GER-  
412 1400 ESP, Radiber SA, Spain) at the University of Lleida, Spain. The pots (200 cm<sup>3</sup>)  
413 were filled with approximately 120-125 g of mixture of 70% soil and 30% peat. Two  
414 seeds were sown in each pot at uniform depth and were kept under dark at room  
415 temperature until seedling emergence. And only one seedling was retained per pot before  
416 shifting the pots to the growth chamber. Extra pots were sown to select 54 pots per NIL  
417 for each chamber which had uniform seedling emergence to avoid differences in plant  
418 development before the start of the experiment. Pots were watered once or twice a week  
419 based on the growth stage/water requirements/treatment. Micro and macro nutrients were  
420 provided through irrigation at 4-leaf stage in all growing conditions. Pots were rotated  
421 once a week within each chamber throughout the experimental period to eliminate any  
422 spatial variation causing differences in micro-environment within the chambers.

423 Treatments consisted of a factorial combination of four near isogenic lines (NILs)  
424 differing in the alleles of both *Eps-7D* (*Eps-7D-early* and *late*) and *Ppd-D1* (*Ppd-D1a*  
425 and *Ppd-D1b*); two photoperiod conditions and three temperatures regimes. The NILs  
426 were derived from the cross Paragon and Baj carrying either *Eps-7D-late* and *Ppd-D1b*  
427 from Paragon or *Eps-7D-early* and *Ppd-D1a* from Baj. In this paper we focused on the  
428 effects of the *Eps-7D* gene and all NILs had the insensitive allele for this major *Ppd* gene  
429 (*Ppd-D1a*), and in the companion paper, we explored whether the sensitivity to  
430 photoperiod may affect the *Eps-D7* (and *Eps-D7* x temperature) effects. The plants were  
431 grown under either 12 or 24 h photoperiod (short day, SD and long day, LD, respectively),  
432 the treatment of LD having only half of the lights on so that daily radiation was the same  
433 for both photoperiod conditions. Three constant temperature regimes (9, 15 and 18 °C)  
434 were imposed under each of the two photoperiods from seedling emergence to anthesis.

435 Nine randomly chosen plants per NIL in each of the six temperature  $\times$  photoperiod  
436 conditions were marked at one leaf stage to record the dynamics of leaf appearance until  
437 the flag leaf was fully emerged. These plants were arranged in a completely randomise  
438 design with 9 replicates (each replicate being an individual plant). The leaf appearance  
439 was recorded three times a week for plants under LD and at least twice a week for plants  
440 under SD at all the temperatures following the scale proposed by Haun et al. (1973). The  
441 same plants were used to map the fertile florets (number of fertile florets at each spikelet)  
442 per spike at anthesis where florets that had either hanging anthers or were at least at the  
443 green anther stage were considered to be fertile. On all plants we measured (i) the  
444 phenological stages of flag leaf emergence (DC39), heading (DC59) and anthesis (DC65)  
445 by visual observation following the scale of Zadoks et al. (1974). The dates for each stage  
446 were recorded after observing the stage in number of representative plants in each NIL.  
447 The rest of the unmarked plants (45 in each combination of NIL  $\times$  photoperiod  $\times$   
448 temperature) were also arranged in a completely randomised design and were sampled at  
449 regular intervals (depending on temperature and photoperiod treatment) to dissect and  
450 record the apex stages and number of primordia until the stage of terminal spikelet (TS),  
451 and from then to anthesis dissecting particular spikelets to determine the number and  
452 stages of each floret primordia. Three plants (replicates) per NIL within each treatment  
453 were sampled every time. Number of spikelet primordia was calculated *a posteriori* by  
454 subtracting final leaf number from the total number of (leaf and spikelet) primordia  
455 recorded until TS. For the determination of stages of development of the spike and florets  
456 we used the scale proposed by Waddington et al. (1983).

457 Nine plants per NIL that were reserved for recording the leaf appearance were sampled  
458 at anthesis, where the final number of fertile florets in each spikelet of the main shoot  
459 spike was determined. The florets were numbered F1 to Fn based on their position with  
460 respect to rachis, F1 being the most proximal to, and Fn the most distal from, the rachis.  
461 Wheat displays asynchronous development of florets across different spikelets of the  
462 spike, so dissection was carried out in three spikelets positions: apical, central or basal  
463 spikelets of the spike. Floret score (dimensionless) was recorded at each sampling for  
464 each individual floret developing in each of the three spikelet positions. We only  
465 considered for the quantitative analysis of traits determining spike fertility in this paper  
466 the floret primordia that reached at least the stage W4.5 (stage when stamen, pistil and  
467 carpel primordia are present). For the dynamics of the number of living florets (floret

468 initiation followed by floret death) we only took into account florets that at least reached  
469 the stage of W4.5 and a floret was considered dead when it did not show developmental  
470 progress (advancement in the floret score) in the following consecutive dissections.

471 For the purpose of presenting more valuable results we averaged the floret scores of  
472 particular floret positions across all the three spikelets (apical, central and basal). While  
473 the development F1 in all the three spike positions was very similar (smaller error bars)  
474 the distal florets (F2 to Fn) had slower development in apical and basal position compared  
475 to that of the central spikelet. So, most of the variation observed due to *Eps-7D* or the  
476 temperature and photoperiods were mostly visible in florets F2 and F3.

477 To determine the overall effects of the *Eps-7D* allele, temperature, photoperiod and their  
478 interactions we subjected the data to a full factorial model (a three-way ANOVA) using  
479 JMP Pro version 14.0 (SAS Institute Inc., Cary, NC, USA). As the main focus of the  
480 paper was to analyse in detail the effect of the *Eps-7D* gene under each of the six growing  
481 conditions, we also carried out one-way ANOVA to determine whether the differences  
482 between NILs in phenology were significant within each combination of temperature and  
483 photoperiod. As the effects of Eps genes are expected to be small, for these analyses we  
484 included, in addition to the most conventional levels of probability for significance (i.e.  
485  $P < 0.05$ ;  $P < 0.01$ ;  $P < 0.001$ ) the P-values in each comparison indicating also whenever  
486 differences had a  $P \leq 0.10$  (i.e. significant only at 0.1 probability level) and used  $P > 0.10$   
487 and  $P >> 0.1$  whenever  $0.1 > P < 0.2$  and between 0.21-0.99, respectively.

488

## 489 **Acknowledgement**

490 Funding for the experimental work was partly provided by projects AGL2015-69595-R,  
491 from the Spanish Research Agency (AEI), and IWYP25FP, from the International Wheat  
492 Yield Partnership (IWYP). We are grateful to the team of laboratory of crop physiology  
493 for assisting with laboratory work. PB held a pre-doctoral research contract from the  
494 Agency for Management of University and Research (AGAUR) from the *Generalitat de*  
495 *Catalunya*.

496

## 497 **References**

498 Abbate, P.E., Andrade, F.H., Culot, J. P, Bindraban, P.S., 1997. Grain yield in

- 499 wheat: Effects of radiation during spike growth period. *Field Crops Res.* 54,  
500 245–257.
- 501 Alvarez, M.A., Tranquilli, G., Lewis, S., Kippes, N., Dubcovsky, J., 2016.  
502 Genetic and physical mapping of the earliness per se locus Eps-A m 1 in  
503 *Triticum monococcum* identifies EARLY FLOWERING 3 (ELF3) as a  
504 candidate gene. *Funct. Integr. Genomics* 16, 365–382.
- 505 Appendino, M.L., Slafer, G.A., 2003. Earliness per se and its dependence upon  
506 temperature in diploid wheat lines differing in the major gene Eps-Am1  
507 alleles. *J Agric Sci.* 141, 149–154.
- 508 Araus, J.L., Slafer, G.A., Reynolds, M.P., Royo, C., 2002. Plant breeding and  
509 drought in C3 cereals: What should we breed for? *Ann. Bot.* 89, 925–940.
- 510 Atkinson, D., Porter, J.R., 1996. Temperature, plant development and crop  
511 yields. *Trends Plant Sci.* 1, 119–124.
- 512 Basavaraddi, P.A., Savin, R., Wingen, L.U., Bencivenga, S., Przewieslik-Allen,  
513 A.M., Griffiths, S., Slafer, G.A., n.d. Interactions between two QTLs for  
514 time to anthesis on spike development and fertility in wheat. Submitted.
- 515 Bentley, A.R., Turner, A.S., Gosman, N., Leigh, F.J., Maccaferri, M.,  
516 Dreisigacker, S., Greenland, A., Laurie, D.A., 2011. Frequency of  
517 photoperiod-insensitive *Ppd-A1a* alleles in tetraploid, hexaploid and  
518 synthetic hexaploid wheat germplasm. *Plant Breed.* 130, 10–15.
- 519 Börner, A., Worland, A.J., Plaschke, J., Schumann, E., Law, C.N., 1993.  
520 Pleiotropic Effects of Genes for Reduced Height (*Rht*) and Day-Length  
521 Insensitivity (*Ppd*) on Yield and its Components for Wheat Grown in Middle  
522 Europe. *Plant Breed.* 111, 204–216.
- 523 Bullrich, L., Appendino, M.L., Tranquilli, G., Lewis, S., Dubcovsky, J., 2002.  
524 Mapping of a thermo-sensitive earliness per se gene on *Triticum*  
525 *monococcum* chromosome 1Am. *Theor. Appl. Genet.* 105, 585–593.
- 526 Ferrante, A., Savin, R., Slafer, G.A., 2013. Is floret primordia death triggered by

- 527        floret development in durum wheat? *J. Exp. Bot.* 64, 2859–2869.
- 528    Fischer, R.A., 2011. Farrer review. Wheat physiology: a review of recent  
529        developments. *Crop Pasture Sci.* 62, 95.
- 530    Fischer, R.A., 2007. Understanding the physiological basis of yield potential in  
531        wheat. *J Agric Sci.* 145, 99–113.
- 532    Foulkes, M.J., Sylvester-Bradley, R., Worland, A.J., Snape, J.W., 2004. Effects  
533        of a photoperiod-response gene *Ppd-D1* on yield potential and drought  
534        resistance in UK winter wheat. *Euphytica* 135, 63–73.
- 535    Gawroński, P., Ariyadasa, R., Himmelbach, A., Poursarebani, N., Kilian, B.,  
536        Stein, N., Steuernagel, B., Hensel, G., Kumlehn, J., Sehgal, S.K., Gill, B.S.,  
537        Gould, P., Hall, A., Schnurbusch, T., 2014. A distorted circadian clock  
538        causes early flowering and temperature-dependent variation in spike  
539        development in the *Eps-3Am* mutant of einkorn wheat. *Genetics*.
- 540    Gillooly, J.F., Charnov, E.L., West, G.B., Savage, V.M., Brown, J.H., 2002.  
541        Effect of size and temperature on developmental time. *Nature* 417, 70–73.
- 542    González, F.G., Slafer, G.A., Miralles, D.J., 2005a. Floret development and  
543        survival in wheat plants exposed to contrasting photoperiod and radiation  
544        environments during stem elongation. *Funct. Plant Biol.* 32, 189–197.
- 545    González, F.G., Slafer, G.A., Miralles, D.J., 2005b. Pre-anthesis development  
546        and number of fertile florets in wheat as affected by photoperiod sensitivity  
547        genes *Ppd-D1* and *Ppd-B1*. *Euphytica* 146, 253–269.
- 548    González, F.G., Slafer, G.A., Miralles, D.J., 2003a. Floret development and spike  
549        growth as affected by photoperiod during stem elongation in wheat. *Field*  
550        *Crops Res.* 81, 29–38.
- 551    González, F.G., Slafer, G.A., Miralles, D.J., 2003b. Grain and floret number in  
552        response to photoperiod during stem elongation in fully and slightly  
553        vernalized wheats. *Field Crops Res.* 81, 17–27.

- 554 Griffiths, S., Simmonds, J., Leverington, M., Wang, Y., Fish, L., Sayers, L.,  
555 Alibert, L., Orford, S., Wingen, L., Herry, L., Faure, S., Laurie, D., Bilham,  
556 L., Snape, J.W., 2009. Meta-QTL analysis of the genetic control of ear  
557 emergence in elite European winter wheat germplasm. *Theor. Appl. Genet.*  
558 119, 383–395.
- 559 Halloran, G.M., Pennell, A.L., 1982. Duration and Rate of Development Phases  
560 in Wheat in Two Environments. *Ann. Bot.* 49, 115–121.
- 561 Haun, J.R., 1973. Visual Quantification of wheat development. *Agron. J.* 65,  
562 116–119.
- 563 Hemming, M.N., Walford, S.A., Fieg, S., Dennis, E.S., Trevaskis, B., 2012.  
564 Identification of high-temperature-responsive genes in Cereals. *Plant*  
565 *Physiol.* 158, 1439–1450.
- 566 John, R.P., Megan, G., 1999. Temperatures and the growth and development of  
567 wheat: a review. *Eur. J. Agron.* 10, 23–36.
- 568 Karsai, I., Igartua, E., Casas, A.M., Kiss, T., Soós, V., Balla, K., Bedo, Z., Veisz,  
569 O., 2013. Developmental patterns of a large set of barley (*Hordeum vulgare*)  
570 cultivars in response to ambient temperature. *Ann. Appl. Biol.* 162, 309–  
571 323.
- 572 Kiss, T., Dixon, L.E., Soltész, A., Bányai, J., Mayer, M., Balla, K., Allard, V.,  
573 Galiba, G., Slafer, G.A., Griffiths, S., Veisz, O., Karsai, I., 2017. Effects of  
574 ambient temperature in association with photoperiod on phenology and on  
575 the expressions of major plant developmental genes in wheat (*Triticum*  
576 *aestivum* L.). *Plant Cell Environ.* 40, 1629–1642.
- 577 Langer, S.M., Longin, C.F.H., Würschum, T., 2014. Flowering time control in  
578 European winter wheat. *Front. Plant Sci.* 5, 1–11.
- 579 Lewis, S., Faricelli, M.E., Appendino, M.L., Valárik, M., Dubcovsky, J., 2008.  
580 The chromosome region including the earliness per se locus *Eps-A m1*  
581 affects the duration of early developmental phases and spikelet number in



- 582           diploid wheat. *J. Exp. Bot.* 59, 3595–3607.
- 583   Miglietta, F., 1989. Effect of photoperiod and temperature on leaf initiation rates  
584           in wheat (*Triticum* spp.). *Field Crops Res.* 21, 121–130.
- 585   Miralles, D.J., Richards, R.A., 2000. Responses of leaf and tiller emergence and  
586           primordium initiation in wheat and barley to interchanged photoperiod. *Ann.*  
587           *Bot.* 85, 655–663.
- 588   Mondal, S., Singh, R.P., Mason, E.R., Huerta-Espino, J., Autrique, E., Joshi,  
589           A.K., 2016. Grain yield, adaptation and progress in breeding for early-  
590           maturing and heat-tolerant wheat lines in South Asia. *Field Crops Res.* 192,  
591           78–85.
- 592   Mosaad, M.G., Ortiz-Ferrara, G., Mahalakshmi, V., Fischer, R.A., 1995.  
593           Phyllochron response to vernalization and photoperiod in spring wheat. *Crop*  
594           *Sci.* 35, 168–171.
- 595   Ochagavía, H., Prieto, P., Savin, R., Griffiths, S., Slafer, G.A., 2018a. Dynamics  
596           of leaf and spikelet primordia initiation in wheat as affected by *Ppd-1a*  
597           alleles under field conditions. *J. Exp. Bot.* 69, 2621–2631.
- 598   Ochagavía, H., Prieto, P., Savin, R., Griffiths, S., Slafer, G.A., 2018b. Earliness  
599           per se effects on developmental traits in hexaploid wheat grown under field  
600           conditions. *Eur. J. Agron.* 99, 214–223.
- 601   Ochagavía, H., Prieto, P., Savin, R., Griffiths, S., Slafer, G.A., 2017. Duration of  
602           developmental phases, and dynamics of leaf appearance and tillering, as  
603           affected by source and doses of photoperiod insensitivity alleles in wheat  
604           under field conditions. *Field Crops Res.* 214, 45–55.
- 605   Ochagavía, H., Prieto, P., Zikhali, M., Griffiths, S., Slafer, G.A., 2019. Earliness  
606           Per Se by Temperature Interaction on Wheat Development. *Sci. Rep.* 9,  
607           2584.
- 608   Parent, B., Tardieu, F., 2012. Temperature responses of developmental processes  
609           have not been affected by breeding in different ecological areas for 17 crop

- 610 species. *New Phytol.* 194, 760–774.
- 611 Pérez-Gianmarco, T.I., Slafer, G.A., González, F.G., 2018. Wheat pre-Anthesis  
612 development as affected by photoperiod sensitivity genes (*Ppd-1*) under  
613 contrasting photoperiods. *Funct. Plant Biol.* 45, 645–657.
- 614 Prieto, P., Ochagavía, H., Griffiths, S., Slafer, G.A., 2020. Earliness per  
615 se×temperature interaction: Consequences on leaf, spikelet, and floret  
616 development in wheat. *J. Exp. Bot.* 71, 1956–1968.
- 617 Prieto, P., Ochagavía, H., Savin, R., Griffiths, S., Slafer, G.A., 2018a.  
618 Physiological determinants of fertile floret survival in wheat as affected by  
619 earliness per se genes under field conditions. *Eur. J. Agron.* 99, 206–213.
- 620 Prieto, P., Ochagavía, H., Savin, R., Griffiths, S., Slafer, G.A., 2018b. Dynamics  
621 of floret initiation/death determining spike fertility in wheat as affected by  
622 *Ppd* genes under field conditions. *J. Exp. Bot.* 69, 2633–2645.
- 623 Rahman, M.S., Wilson, J.H., 1978. Determination of spikelet number in wheat.  
624 III.\* Effect of varying temperature on ear development. *Aust. J. Agric. Res.*  
625 29, 459–467.
- 626 Rawson, H.M., Richards, R.A., 1993. Effects of high temperature and  
627 photoperiod on floral development in wheat isolines differing in  
628 vernalisation and photoperiod genes. *Field Crops Res.* 32, 181–192.
- 629 Reynolds, M.P., Foulkes, J., Furbank, R., Griffiths, S., King, J., Murchie, E.,  
630 Parry, M., Slafer, G.A., 2012. Achieving yield gains in wheat. *Plant, Cell*  
631 *Environ.* 35, 1799–1823.
- 632 Richards, R.A., 1991. Crop improvement for temperate Australia: Future  
633 opportunities. *Field Crops Res.* 26, 141–169.
- 634 Serrago, R.A., Miralles, D.J., Slafer, G.A., 2008. Floret fertility in wheat as  
635 affected by photoperiod during stem elongation and removal of spikelets at  
636 booting. *Eur. J. Agron.* 28, 301–308.

- 637 Shaw, L.M., Turner, A.S., Herry, L., Griffiths, S., Laurie, D.A., 2013. Mutant  
638 alleles of Photoperiod-1 in Wheat (*Triticum aestivum* L.) that confer a late  
639 flowering phenotype in long days. PLoS One 8.
- 640 Shaw, L.M., Turner, A.S., Laurie, D.A., 2012. The impact of photoperiod  
641 insensitive *Ppd-1a* mutations on the photoperiod pathway across the three  
642 genomes of hexaploid wheat (*Triticum aestivum*). Plant J. 71, 71–81.
- 643 Slafer, G.A., 2003. Genetic basis of yield as viewed from a crop physiologist's  
644 perspective. Ann. Appl. Biol. 142, 117–128.
- 645 Slafer, G.A., 1996. Differences in phasic development rate amongst wheat  
646 cultivars independent of responses to photoperiod and vernalization. A  
647 viewpoint of the intrinsic earliness hypothesis. J Agric Sci. 126, 403–419.
- 648 Slafer, G.A., Elia, M., Savin, R., García, G.A., Terrile, I.I., Ferrante, A., Miralles,  
649 D.J., González, F.G., 2015. Fruiting efficiency: An alternative trait to further  
650 rise wheat yield. Food Energy Secur. 4, 92–109.
- 651 Slafer, G.A., Rawson, H.M., 1997. Phyllochron in wheat as affected by  
652 photoperiod under two temperature regimes. Aust. J. Plant Physiol. 24, 151–  
653 158.
- 654 Slafer, G.A., Rawson, H.M., 1996. Responses to photoperiod change with  
655 phenophase and temperature during wheat development. Field Crops Res.  
656 46, 1–13.
- 657 Slafer, G.A., Rawson, H.M., 1995. Intrinsic earliness and basic development rate  
658 assessed for their response to temperature in wheat. Euphytica 83, 175–183.
- 659 Slafer, G.A., Rawson, H.M., 1994a. Does temperature affect final numbers of  
660 primordia in wheat? Field Crops Res. 39, 111–117.
- 661 Slafer, G.A., Rawson, H.M., 1994b. Sensitivity of wheat phasic development to  
662 major environmental factors: A re-examination of some assumptions made  
663 by physiologists and modellers. Aust. J. Plant Physiol. 21, 393–426.

- 664 Slafer, G.A., Savin, R., Sadras, V.O., 2014. Coarse and fine regulation of wheat  
665 yield components in response to genotype and environment. *Field Crops*  
666 *Res.* 157, 71–83.
- 667 Snape, J.W., Butterworth, K., Whitechurch, E., Worland, A.J., 2001. Waiting for  
668 fine times: Genetics of flowering time in wheat. *Euphytica* 119, 185–190.
- 669 Steinfort, U., Trevaskis, B., Fukai, S., Bell, K.L., Dreccer, M.F., 2017.  
670 Vernalisation and photoperiod sensitivity in wheat: Impact on canopy  
671 development and yield components. *Field Crops Res.* 201, 108–121.
- 672 Waddington, S.R., Cartwright, P.M., Wall, P.C., 1983. A Quantitative Scale of  
673 Spike Initial and Pistil Development in Barley and Wheat. *Ann. Bot.* 51,  
674 119–130.
- 675 Wall, P.C., Cartwright, P.M., 1974. Effects of photoperiod, temperature and  
676 vernalization on the phenology and spikelet numbers of spring wheats. *Ann.*  
677 *Appl. Biol.* 76, 299–309.
- 678 Whitechurch, E.M., Slafer, G.A., 2001. Responses to photoperiod before and  
679 after jointing in wheat substitution lines. *Euphytica* 118, 47–51.
- 680 Wingen, L.U., West, C., Waite, M.L., Collier, S., Orford, S., Goram, R., Yang,  
681 C.Y., King, J., Allen, A.M., Burridge, A., Edwards, K.J., Griffiths, S., 2017.  
682 Wheat landrace genome diversity. *Genetics* 205, 1657–1676.
- 683 Würschum, T., Leiser, W.L., Langer, S.M., Tucker, M.R., Longin, C.F.H., 2018.  
684 Phenotypic and genetic analysis of spike and kernel characteristics in wheat  
685 reveals long-term genetic trends of grain yield components. *Theor. Appl.*  
686 *Genet.* 131, 2071–2084.
- 687 Zadoks, J.C., Chang, T.T., Konzak, C.F., 1974. A decimal code for the growth  
688 stages of cereals. *Weed Res.* 14, 415–421.
- 689 Zikhali, M., Leverington-Waite, M., Fish, L., Simmonds, J., Orford, S., Wingen,  
690 L.U., Goram, R., Gosman, N., Bentley, A., Griffiths, S., 2014. Validation of  
691 a 1DL earliness per se (eps) flowering QTL in bread wheat (*Triticum*

692 *aestivum*). Mol. Breed. 34, 1023–1033.

693
